# Supplementary material
Source: publisher figshare collection journal article supplement (https://aacr.figshare.com/articles/dataset/_/22474472)
Supplement: Supplementary file 1 [file 39925967]

**A**

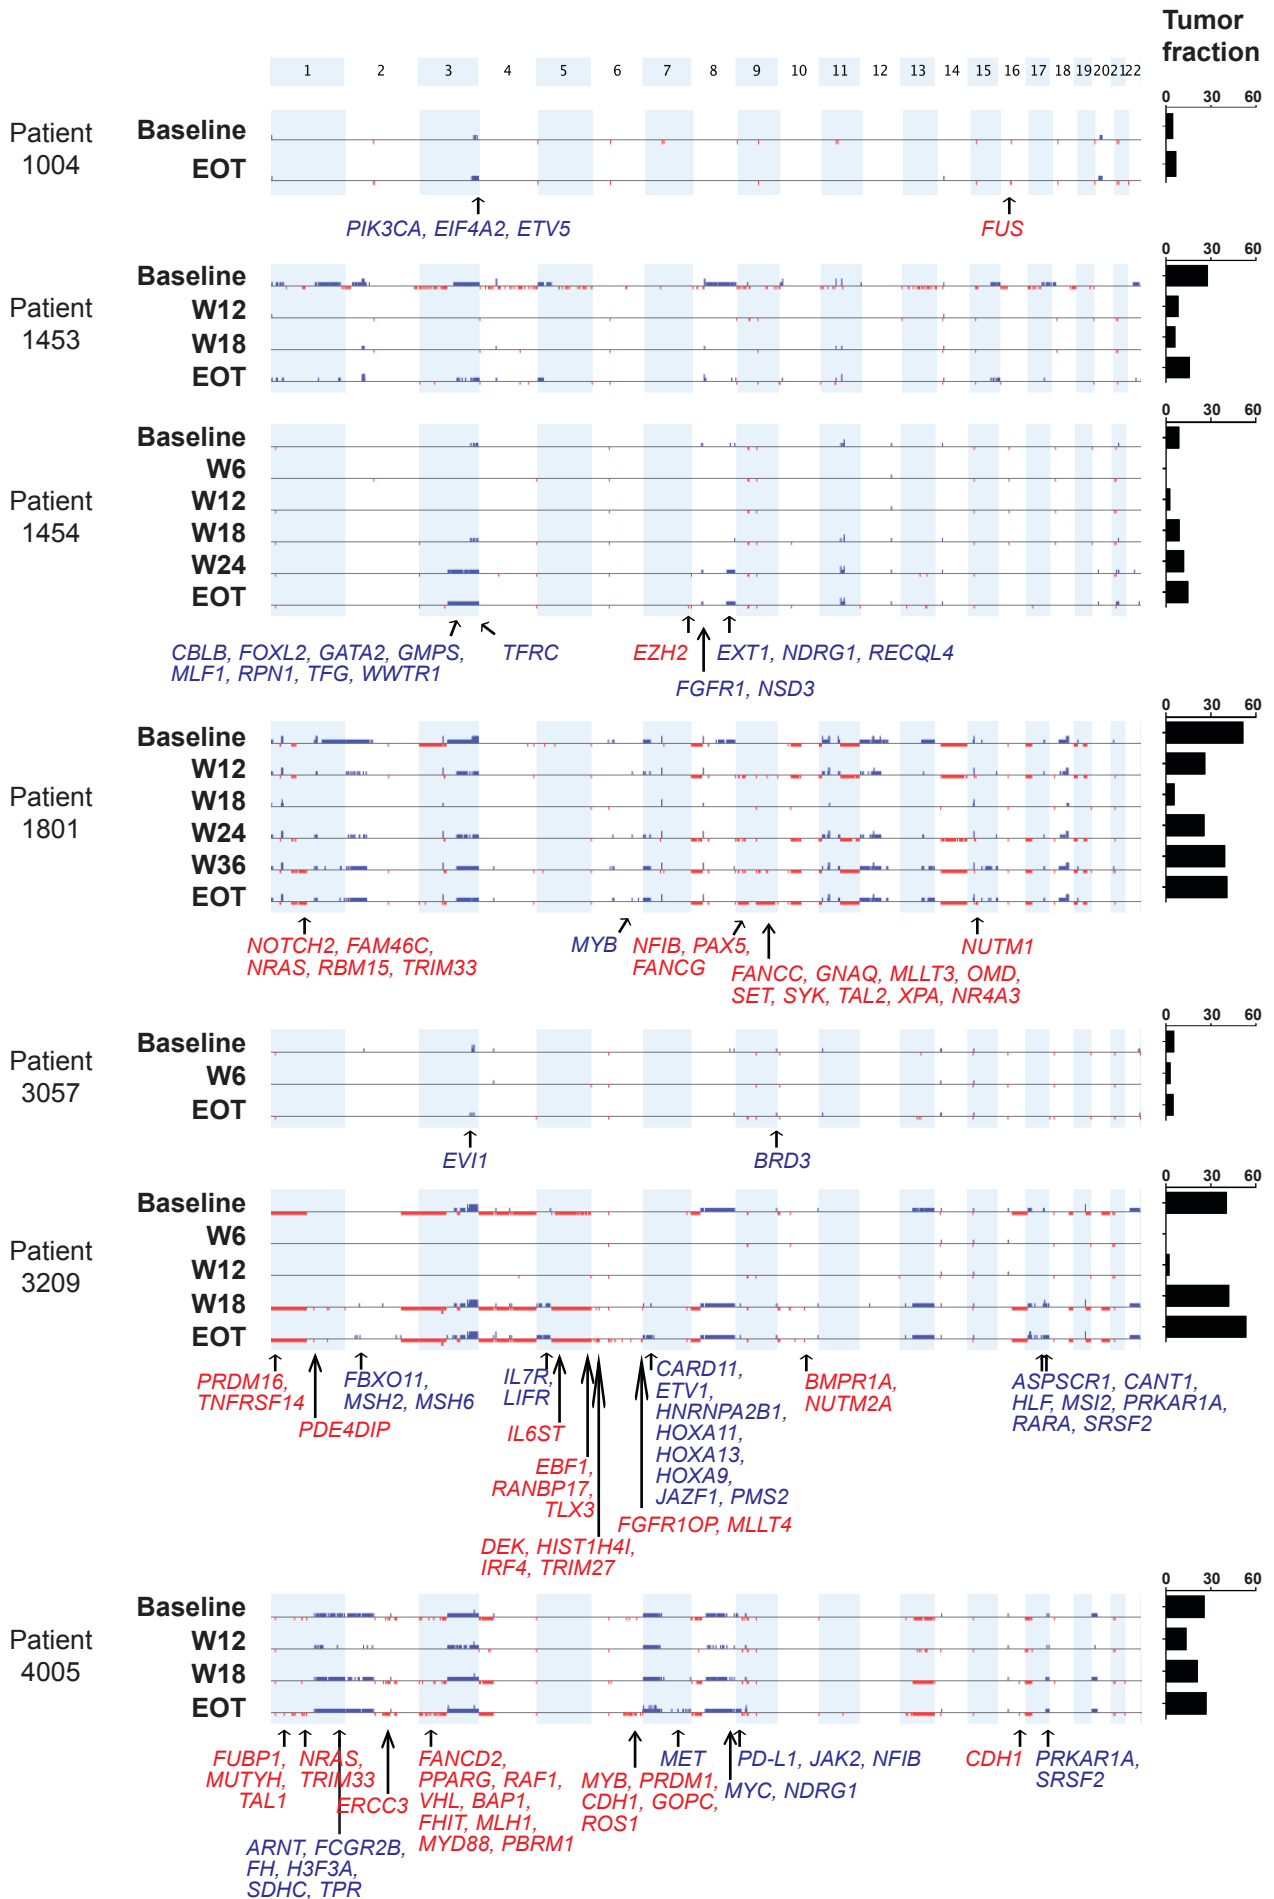

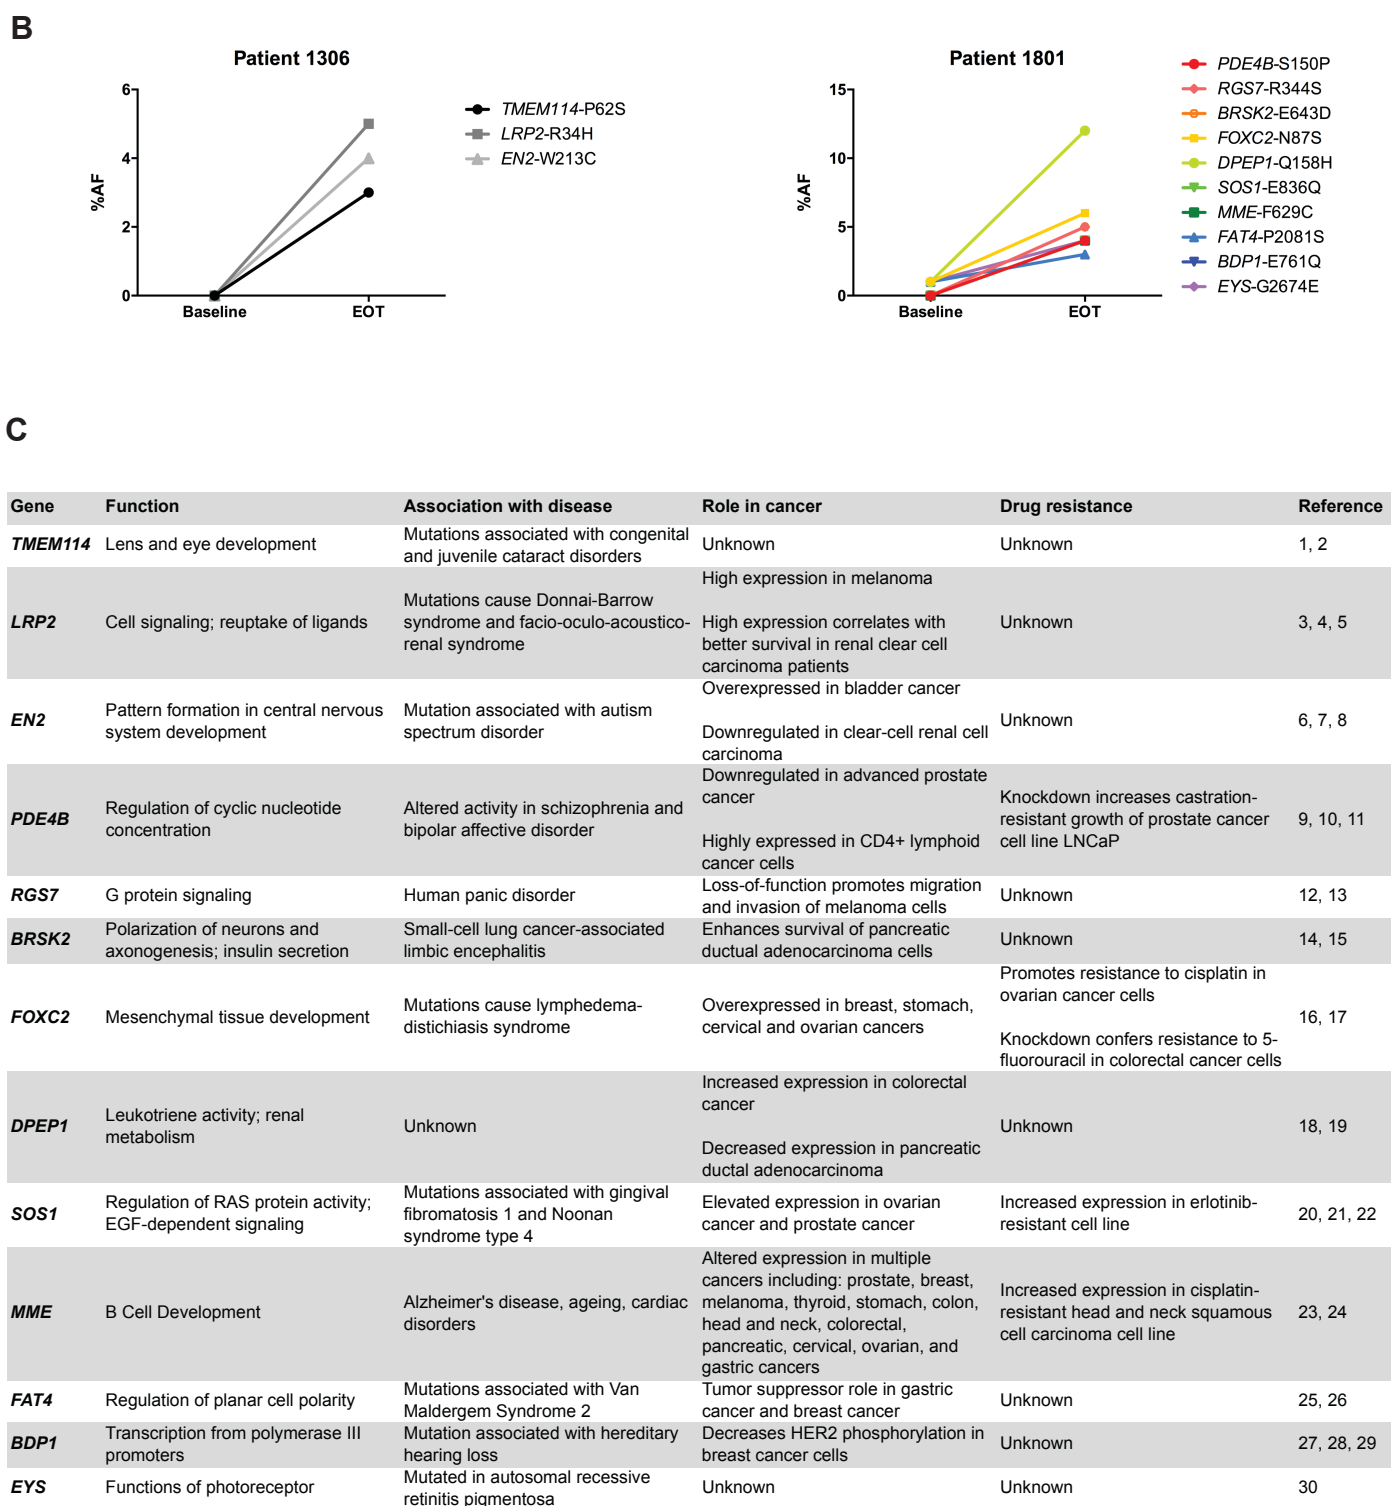

**Figure S8.**

**A**, CNV landscapes of 7 patients treated with pictilisib and had detectable CNVs at both baseline and EOT. COSMIC genes with CNVs not found at baseline but in EOT were annotated. Blue, copy number gain; red, copy number loss. **(B-C)** Somatic variants significantly increased in EOT compared to baseline cfDNA in two patients.

**B**, Gene mutation allele frequency at baseline and EOT. **C**, Known functions of all genes enriched in EOT and their roles in disease and drug resistance.

## Supplementary References

1. Jamieson RV, Farrar N, Stewart K, Perveen R, Mihelec M, Carette M, *et al.* Characterization of a familial t(16;22) balanced translocation associated with congenital cataract leads to identification of a novel gene, TMEM114, expressed in the lens and disrupted by the translocation. *Hum Mutat* **2007**;28(10):968-77 doi 10.1002/humu.20545.
2. Mihelec M, St Heaps L, Flaherty M, Billson F, Rudduck C, Tam PP, *et al.* Chromosomal rearrangements and novel genes in disorders of eye development, cataract and glaucoma. *Twin Res Hum Genet* **2008**;11(4):412-21 doi 10.1375/twin.11.4.412.
3. Christ A, Herzog K, Willnow TE. LRP2, an auxiliary receptor that controls sonic hedgehog signaling in development and disease. *Dev Dyn* **2016**;245(5):569-79 doi 10.1002/dvdy.24394.
4. Gonias SL, Karimi-Mostowfi N, Murray SS, Mantuano E, Gilder AS. Expression of LDL receptor-related proteins (LRPs) in common solid malignancies correlates with patient survival. *PLoS One* **2017**;12(10):e0186649 doi 10.1371/journal.pone.0186649.
5. Andersen RK, Hammer K, Hager H, Christensen JN, Ludvigsen M, Honore B, *et al.* Melanoma tumors frequently acquire LRP2/megalin expression, which modulates melanoma cell proliferation and survival rates. *Pigment Cell Melanoma Res* **2015**;28(3):267-80 doi 10.1111/pcmr.12352.
6. Hnoonual A, Sripo T, Limprasert P. Whole-exome sequencing identifies a novel heterozygous missense variant of the EN2 gene in two unrelated patients with autism spectrum disorder. *Psychiatr Genet* **2016**;26(6):297-301 doi 10.1097/YPG.0000000000000153.
7. Li Y, Liu H, Lai C, Su Z, Heng B, Gao S. Repression of engrailed 2 inhibits the proliferation and invasion of human bladder cancer in vitro and in vivo. *Oncol Rep* **2015**;33(5):2319-30 doi 10.3892/or.2015.3858.
8. Lai CY, Xu Y, Yu GS, Wu X, Li YF, Pan B, *et al.* Engrailed-2 might play an anti-oncogenic role in clear-cell renal cell carcinoma. *J Mol Histol* **2016**;47(3):229-37 doi 10.1007/s10735-016-9665-4.
9. Feng Y, Cheng D, Zhang C, Li Y, Zhang Z, Wang J, *et al.* Association of PDE4B Polymorphisms with Susceptibility to Schizophrenia: A Meta-Analysis of Case-Control Studies. *PLoS One* **2016**;11(1):e0147092 doi 10.1371/journal.pone.0147092.
10. Kashiwagi E, Shiota M, Yokomizo A, Itsumi M, Inokuchi J, Uchiumi T, *et al.* Downregulation of phosphodiesterase 4B (PDE4B) activates protein kinase A and contributes to the progression of prostate cancer. *Prostate* **2012**;72(7):741-51 doi 10.1002/pros.21478.
11. Nagy ZS, Ross JA, Rodriguez G, Balint BL, Szeles L, Nagy L, *et al.* Genome wide mapping reveals PDE4B as an IL-2 induced STAT5 target gene in activated human PBMCs and lymphoid cancer cells. *PLoS One* **2013**;8(2):e57326 doi 10.1371/journal.pone.0057326.

12. Sabater L, Gomez-Choco M, Saiz A, Graus F. BR serine/threonine kinase 2: a new autoantigen in paraneoplastic limbic encephalitis. *J Neuroimmunol* **2005**;170(1-2):186-90 doi 10.1016/j.jneuroim.2005.08.011.
13. Saiyin H, Na N, Han X, Fang Y, Wu Y, Lou W, *et al.* BRSK2 induced by nutrient deprivation promotes Akt activity in pancreatic cancer via downregulation of mTOR activity. *Oncotarget* **2017**;8(27):44669-81 doi 10.18632/oncotarget.17965.
14. Hohoff C, Neumann A, Domschke K, Jacob C, Maier W, Fritze J, *et al.* Association analysis of Rgs7 variants with panic disorder. *J Neural Transm (Vienna)* **2009**;116(11):1523-8 doi 10.1007/s00702-008-0097-5.
15. Qutob N, Masuho I, Alon M, Emmanuel R, Cohen I, Di Pizio A, *et al.* RGS7 is recurrently mutated in melanoma and promotes migration and invasion of human cancer cells. *Sci Rep* **2018**;8(1):653 doi 10.1038/s41598-017-18851-4.
16. Wang T, Zheng L, Wang Q, Hu YW. Emerging roles and mechanisms of FOXC2 in cancer. *Clin Chim Acta* **2018**;479:84-93 doi 10.1016/j.cca.2018.01.019.
17. Tavian D, Missaglia S, Maltese PE, Michelini S, Fiorentino A, Ricci M, *et al.* FOXC2 disease-mutations identified in lymphedema-distichiasis patients cause both loss and gain of protein function. *Oncotarget* **2016**;7(34):54228-39 doi 10.18632/oncotarget.9797.
18. Eisenach PA, Soeth E, Roder C, Kloppel G, Tepel J, Kalthoff H, *et al.* Dipeptidase 1 (DPEP1) is a marker for the transition from low-grade to high-grade intraepithelial neoplasia and an adverse prognostic factor in colorectal cancer. *Br J Cancer* **2013**;109(3):694-703 doi 10.1038/bjc.2013.363.
19. Zhang G, Schetter A, He P, Funamizu N, Gaedcke J, Ghadimi BM, *et al.* DPEP1 inhibits tumor cell invasiveness, enhances chemosensitivity and predicts clinical outcome in pancreatic ductal adenocarcinoma. *PLoS One* **2012**;7(2):e31507 doi 10.1371/journal.pone.0031507.
20. Xiao ZH, Linghu H, Liu QF. [Expressions of Ras and Sos1 in epithelial ovarian cancer tissues and their clinical significance]. *Nan Fang Yi Ke Da Xue Xue Bao* **2016**;36(11):1502-7.
21. De S, Dermawan JK, Stark GR. EGF receptor uses SOS1 to drive constitutive activation of NFkappaB in cancer cells. *Proc Natl Acad Sci U S A* **2014**;111(32):11721-6 doi 10.1073/pnas.1412390111.
22. Timofeeva OA, Zhang X, Ransom HW, Varghese RS, Kallakury BV, Wang K, *et al.* Enhanced expression of SOS1 is detected in prostate cancer epithelial cells from African-American men. *Int J Oncol* **2009**;35(4):751-60.
23. Mishra D, Singh S, Narayan G. Role of B Cell Development Marker CD10 in Cancer Progression and Prognosis. *Mol Biol Int* **2016**;2016:4328697 doi 10.1155/2016/4328697.
24. Fukusumi T, Ishii H, Konno M, Yasui T, Nakahara S, Takenaka Y, *et al.* CD10 as a novel marker of therapeutic resistance and cancer stem cells in head and neck squamous cell carcinoma. *Br J Cancer* **2014**;111(3):506-14 doi 10.1038/bjc.2014.289.

25. Cai J, Feng D, Hu L, Chen H, Yang G, Cai Q, *et al.* FAT4 functions as a tumour suppressor in gastric cancer by modulating Wnt/beta-catenin signalling. *Br J Cancer* **2015**;113(12):1720-9 doi 10.1038/bjc.2015.367.
26. Hou L, Chen M, Zhao X, Li J, Deng S, Hu J, *et al.* FAT4 functions as a tumor suppressor in triple-negative breast cancer. *Tumour Biol* **2016** doi 10.1007/s13277-016-5421-3.
27. Girotto G, Abdulhadi K, Buniello A, Vozzi D, Licastro D, d'Eustacchio A, *et al.* Linkage study and exome sequencing identify a BDP1 mutation associated with hereditary hearing loss. *PLoS One* **2013**;8(12):e80323 doi 10.1371/journal.pone.0080323.
28. Gouge J, Guthertz N, Kramm K, Dergai O, Abascal-Palacios G, Satia K, *et al.* Molecular mechanisms of Bdp1 in TFIIIB assembly and RNA polymerase III transcription initiation. *Nat Commun* **2017**;8(1):130 doi 10.1038/s41467-017-00126-1.
29. Thaler S, Schmidt M, Robetawag S, Thiede G, Schad A, Sleeman JP. Proteasome inhibitors prevent bi-directional HER2/estrogen-receptor cross-talk leading to cell death in endocrine and lapatinib-resistant HER2+/ER+ breast cancer cells. *Oncotarget* **2017**;8(42):72281-301 doi 10.18632/oncotarget.20261.
30. Gu S, Tian Y, Chen X, Zhao C. Targeted next-generation sequencing extends the phenotypic and mutational spectrums for EYS mutations. *Mol Vis* **2016**;22:646-57.
